# Supplementary material
Source: publisher site journal article supplement (https://www.dovepress.com/get_supplementary_file.php?f=485061.docx)
Supplement: Supplementary file 1 [file get_supplementary_file.php]

**Supplemental Table 1.** The Critical Appraisal Skills Program (CASP) checklist for cohort studies was used to assess bias and relevance of included case reports, cohort studies, and case series.

|  | Buysschaert, 201211 | Costanzo, 202112 | Faurschou, 201416 | Malavazos, 202313 | Nowowiejska, 202314 | Reid, 201315 | Ahern, 201317 | Buysschaert, 201418 | Hogan, 201119 | Xu, 201920 |
| --- | --- | --- | --- | --- | --- | --- | --- | --- | --- | --- |
| **1. Did the study address a clearly focused issue?** | + | + | + | + | + | + | + | + | + | + |
| **2. Was the cohort recruited in an acceptable way?** | + | + | + | + | + | + | + | + | - | + |
| **3. Was the exposure accurately measured to minimize bias?** | + | + | + | + | - | + | + | + | ? | + |
| **4. Was the outcome accurately measured to minimize bias?** | + | + | + | + | + | + | + | + | + | + |
| **5 (a). Have the authors identified all important confounding factors?** | + | + | + | + | - | + | + | + | + | + |
| **5 (b). Have the authors taken account of the confounding factors in the design and/or analysis?** | + | + | + | + | - | + | + | + | + | + |
| **6 (a). Was the follow up of subjects complete enough?** | + | - | + | + | - | + | - | + | + | + |
| **6 (b). Was the follow up of subjects long enough** | + | + | - | + | - | + | - | + | - | - |
| **7. What are the results of this study?** | See  Table 1 | See  Table 1 | See  Table 1 | See  Table 1 | See  Table 1 | See  Table 1 | See  Table 1 | See  Table 1 | See Table 1 | See Table 1 |
| **8. Was the precision of results acceptable?** | + | + | + | + | - | + | + | + | + | + |
| **9. Do you believe the results?** | + | + | + | + | ? | + | + | - | + | + |
| **10. Can the results be applied to the local population?** | - | - | - | - | - | - | - | - | - | - |
| **11. Do the results of this study fit with other available evidence?** | + | + | + | + | - | + | + | + | + | + |
| **12. What are the implications of this study for practice?** | + | + | + | + | + | + | + | + | + | + |

Each study was appraised using the checklist and was designated (+) for *Yes*, (-) for *No*, and (?) for *Cannot tell* for each question on the checklist.

**Supplemental Table 2.** The Critical Appraisal Skills Program (CASP) checklist for randomized controlled trials was used to assess the bias and relevance of included studies.

|  | Faurschou, 201522 | Lin, 202221 |
| --- | --- | --- |
| **1. Did the study address a clearly focused research question?** | + | + |
| **2. Was the assignment of participants to interventions randomized?** | + | + |
| **3. Were all participants who entered the study accounted for at its conclusion?** | + | + |
| **4a. Were all participants ‘blind’ to intervention they were given?** | + | ? |
| **4b. Were the investigators ‘blind’ to the interventions they were giving to participants?** | + | ? |
| **4c. Were the people assessing/analyzing outcomes/s ‘blinded’?** | + | ? |
| **5. Were the study groups similar at the start of the randomized control trial?** | - | + |
| **6. Apart from the experimental intervention, did each study group receive the same level of care (that is, were they treated equally?** | + | + |
| **7. Were the effects of intervention reported comprehensively?** | - | - |
| **8. Was the precision of the estimate of the intervention or treatment effect reported?** | + | + |
| **9. Do the benefits of the experimental intervention outweigh the harms and costs?** | ? | + |
| **10. Can the results be applied to your local population/in your context?** | - | - |
| **11. Would the experimental intervention provide greater value to the people in your care than any of the existing interventions?** | ? | ? |

Each study was appraised using the checklist and was designated (+) for *Yes*, (-) for *No*, and (?) for *Cannot tell* for each question on the checklist.
